# Supplementary material
Source: MDPI journal article supplement (https://www.mdpi.com/2312-7481/9/3/83)
Supplement: s1 [file s1]

# Four-Component Relativistic Calculations of NMR Shielding Constants of the Transition Metal Complexes—Part 3: Fe, Co, Ni, Pd, and Pt Glycinates

Dmitry O. Samultsev, Valentin A. Semenov and Leonid B. Krivdin \*

A. E. Favorsky Irkutsk Institute of Chemistry, Siberian Branch of the Russian Academy of Sciences,  
Favorsky St. 1, 664033 Irkutsk, Russia

\* Correspondence: krivdin55@gmail.com

**Cartesian coordinates (Angstroms) of chelate glycinates 1-6, optimized at the CCSD/TZP level.**

Complex № 1:

[FeGly<sub>2</sub>].2H<sub>2</sub>O

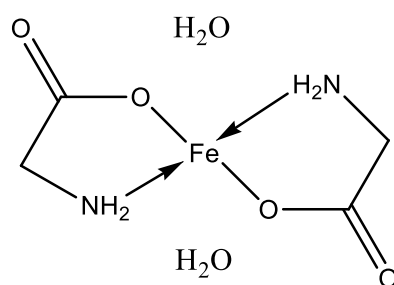

|    |              |             |             |
|----|--------------|-------------|-------------|
| Fe | 2.135695000  | 6.565600000 | 4.329904000 |
| N  | 0.131853000  | 6.843895000 | 4.358586000 |
| N  | 4.139537000  | 6.287305000 | 4.301223000 |
| O  | 2.149355000  | 8.124761000 | 5.502251000 |
| O  | 2.365268000  | 7.506747000 | 2.506932000 |
| O  | 0.862192000  | 9.824149000 | 6.254559000 |
| O  | 2.122035000  | 5.006439000 | 3.157558000 |
| O  | 1.906122000  | 5.624453000 | 6.152877000 |
| O  | 3.409198000  | 3.307051000 | 2.405250000 |
| C  | 1.048123000  | 8.808581000 | 5.597140000 |
| C  | -0.125081000 | 8.253290000 | 4.744806000 |
| C  | 3.223267000  | 4.322619000 | 3.062669000 |
| C  | 4.396471000  | 4.877910000 | 3.915003000 |
| H  | 1.901081000  | 8.310517000 | 2.227537000 |
| H  | 2.090787000  | 6.767986000 | 1.926338000 |
| H  | -0.369995000 | 6.582218000 | 3.507946000 |
| H  | -0.218598000 | 6.208147000 | 5.079665000 |
| H  | -1.074070000 | 8.384446000 | 5.293941000 |
| H  | -0.201717000 | 8.870004000 | 3.830797000 |
| H  | 2.370309000  | 4.820683000 | 6.432272000 |
| H  | 2.180603000  | 6.363214000 | 6.733471000 |
| H  | 4.641385000  | 6.548982000 | 5.151863000 |
| H  | 4.489988000  | 6.923053000 | 3.580144000 |
| H  | 5.345460000  | 4.746754000 | 3.365868000 |
| H  | 4.473107000  | 4.261196000 | 4.829012000 |

Complex № 2:

*fac*-[CoGly<sub>3</sub>]

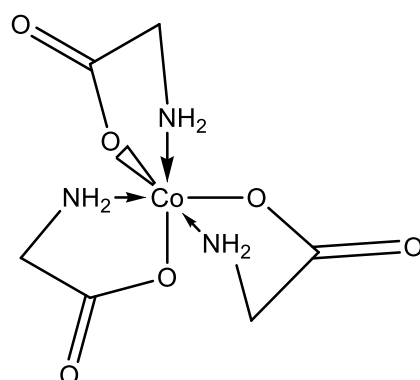

|    |             |              |              |
|----|-------------|--------------|--------------|
| Co | 5.325651000 | 9.330326000  | 7.733021000  |
| O  | 4.097055000 | 12.978710000 | 7.137039000  |
| O  | 5.010246000 | 11.129942000 | 8.039181000  |
| O  | 2.093652000 | 7.173358000  | 8.010523000  |
| O  | 3.526672000 | 8.888306000  | 7.743825000  |
| O  | 6.891890000 | 9.326489000  | 11.299849000 |
| O  | 5.557188000 | 8.940419000  | 9.529186000  |
| N  | 4.978971000 | 9.771372000  | 5.832206000  |
| N  | 5.623750000 | 7.384949000  | 7.499577000  |
| N  | 7.228570000 | 9.881622000  | 7.786172000  |
| C  | 4.044375000 | 10.939107000 | 5.871128000  |
| C  | 4.389899000 | 11.798044000 | 7.098473000  |
| C  | 4.449338000 | 6.732688000  | 8.158294000  |
| C  | 3.219223000 | 7.633783000  | 7.962393000  |
| C  | 7.461201000 | 10.330521000 | 9.194358000  |
| C  | 6.594392000 | 9.470602000  | 10.128548000 |
| H  | 5.802173000 | 10.008651000 | 5.272579000  |
| H  | 4.520168000 | 8.994710000  | 5.350092000  |
| H  | 4.091400000 | 11.537275000 | 4.946279000  |
| H  | 3.019717000 | 10.553224000 | 6.004873000  |
| H  | 5.700302000 | 7.058765000  | 6.532681000  |
| H  | 6.479389000 | 7.082706000  | 7.971455000  |
| H  | 4.262876000 | 5.720677000  | 7.762783000  |
| H  | 4.654871000 | 6.669910000  | 9.240205000  |
| H  | 7.909071000 | 9.158362000  | 7.539271000  |
| H  | 7.404031000 | 10.666421000 | 7.154158000  |
| H  | 8.524931000 | 10.269368000 | 9.477379000  |
| H  | 7.119558000 | 11.375712000 | 9.281373000  |

Complex № 3:  
*mer*-[CoGly<sub>3</sub>]

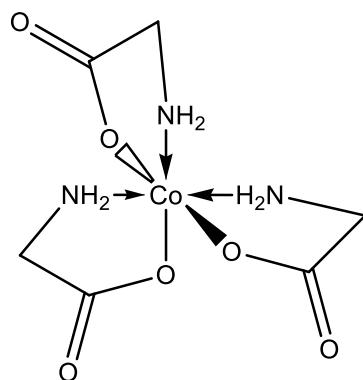

|    |              |              |              |
|----|--------------|--------------|--------------|
| Co | -0.534710000 | 7.647190000  | 10.118207000 |
| N  | -1.709923000 | 7.448654000  | 11.646192000 |
| N  | 0.602442000  | 8.240823000  | 8.655229000  |
| N  | 0.097404000  | 5.786655000  | 10.087915000 |
| O  | 0.829099000  | 8.049133000  | 11.326043000 |
| O  | 1.188423000  | 8.506750000  | 13.504571000 |
| O  | -1.205167000 | 9.378677000  | 10.104043000 |
| O  | -0.672545000 | 11.487641000 | 9.512717000  |
| O  | -1.866066000 | 7.052106000  | 8.921366000  |
| O  | -2.496988000 | 5.290836000  | 7.652041000  |
| C  | 0.445568000  | 8.266556000  | 12.572739000 |
| C  | -1.082887000 | 8.211695000  | 12.770880000 |
| C  | -0.452012000 | 10.292605000 | 9.526365000  |
| C  | 0.805921000  | 9.709540000  | 8.859449000  |
| C  | -1.733813000 | 5.842827000  | 8.423367000  |
| C  | -0.438213000 | 5.120068000  | 8.865642000  |
| H  | -1.949772000 | 6.494699000  | 11.937273000 |
| H  | -2.585695000 | 7.890842000  | 11.339517000 |
| H  | 0.082330000  | 8.082735000  | 7.782480000  |
| H  | 1.512819000  | 7.774942000  | 8.566655000  |
| H  | -0.213046000 | 5.283093000  | 10.926426000 |
| H  | 1.123155000  | 5.765706000  | 10.137354000 |
| H  | -1.462686000 | 9.247280000  | 12.740202000 |
| H  | -1.327330000 | 7.771368000  | 13.752209000 |
| H  | 1.654061000  | 9.844573000  | 9.552337000  |
| H  | 1.021362000  | 10.229786000 | 7.910797000  |
| H  | 0.304691000  | 5.208738000  | 8.051352000  |
| H  | -0.629669000 | 4.044551000  | 9.022710000  |

Complex № 4:

[NiGly<sub>2</sub>]

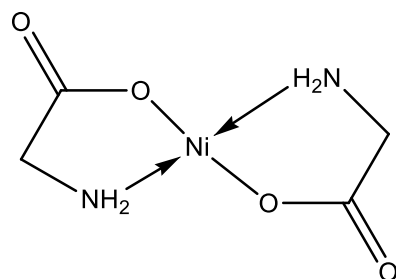

|    |              |              |             |
|----|--------------|--------------|-------------|
| Ni | 1.843391000  | 1.309300000  | 4.127042000 |
| N  | 0.329923000  | 2.468713000  | 4.177602000 |
| N  | 3.356860000  | 0.149887000  | 4.076482000 |
| O  | -1.173150000 | -0.225870000 | 6.000796000 |
| O  | 0.881387000  | 0.138979000  | 5.138105000 |
| O  | 4.859932000  | 2.844470000  | 2.253288000 |
| O  | 2.805395000  | 2.479621000  | 3.115979000 |
| C  | -0.389577000 | 0.412704000  | 5.324809000 |
| C  | -0.858176000 | 1.654566000  | 4.536149000 |
| C  | 4.076359000  | 2.205896000  | 2.929275000 |
| C  | 4.544959000  | 0.964034000  | 3.717935000 |
| H  | 0.497176000  | 3.185723000  | 4.881675000 |
| H  | 0.216483000  | 2.968700000  | 3.298345000 |
| H  | -1.333579000 | 1.299584000  | 3.605669000 |
| H  | -1.603282000 | 2.225647000  | 5.112042000 |
| H  | 3.189607000  | -0.567123000 | 3.372409000 |
| H  | 3.470300000  | -0.350100000 | 4.955739000 |
| H  | 5.020362000  | 1.319016000  | 4.648415000 |
| H  | 5.290064000  | 0.392953000  | 3.142042000 |

Complex № 5:

[PdGly<sub>2</sub>]

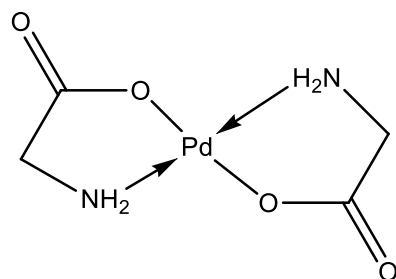

|    |              |             |             |
|----|--------------|-------------|-------------|
| Pd | -1.968411000 | 4.523000000 | 3.364486000 |
| N  | -1.128694000 | 5.709758000 | 1.966875000 |
| N  | -2.808128000 | 3.336242000 | 4.762097000 |
| O  | -3.483935000 | 4.450814000 | 2.124764000 |
| O  | -4.262955000 | 5.374274000 | 0.224980000 |
| O  | -0.452887000 | 4.595186000 | 4.604207000 |
| O  | 0.326133000  | 3.671726000 | 6.503992000 |
| C  | -2.238772000 | 6.266983000 | 1.146857000 |
| C  | -3.438088000 | 5.291293000 | 1.114166000 |
| C  | -0.498734000 | 3.754707000 | 5.614806000 |
| C  | -1.698050000 | 2.779017000 | 5.582115000 |
| H  | -0.550450000 | 6.437905000 | 2.380964000 |
| H  | -0.509848000 | 5.138217000 | 1.394302000 |
| H  | -2.586322000 | 7.193770000 | 1.634224000 |
| H  | -1.914508000 | 6.506844000 | 0.121981000 |
| H  | -3.386372000 | 2.608095000 | 4.348008000 |
| H  | -3.426974000 | 3.907783000 | 5.334670000 |
| H  | -1.350500000 | 1.852230000 | 5.094748000 |
| H  | -2.022314000 | 2.539156000 | 6.606991000 |

Complex № 6:

[PtGly<sub>2</sub>]

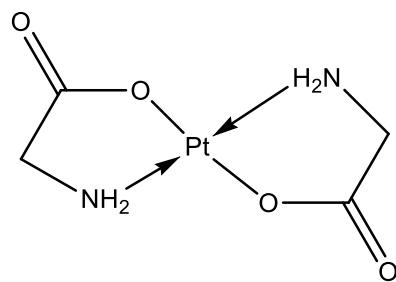

|    |              |              |              |
|----|--------------|--------------|--------------|
| Pt | 0.062782000  | 0.034358000  | 0.026475000  |
| N  | -1.335952000 | 0.534297000  | -1.361883000 |
| N  | 1.461516000  | -0.465581000 | 1.414833000  |
| O  | 1.136124000  | 1.439974000  | -0.896616000 |
| O  | 1.169813000  | 2.755613000  | -2.723215000 |
| O  | -1.010560000 | -1.371258000 | 0.949566000  |
| O  | -1.044249000 | -2.686897000 | 2.776165000  |
| C  | -0.647943000 | 1.213961000  | -2.502809000 |
| C  | 0.656730000  | 1.897942000  | -2.030491000 |
| C  | 0.773507000  | -1.145245000 | 2.555759000  |
| C  | -0.531166000 | -1.829226000 | 2.083441000  |
| H  | -0.371354000 | 0.446959000  | -3.247993000 |
| H  | -1.305907000 | 1.949342000  | -2.995471000 |
| H  | -1.876533000 | -0.277190000 | -1.676699000 |
| H  | -2.018044000 | 1.167254000  | -0.930479000 |
| H  | 2.002097000  | 0.345906000  | 1.729649000  |
| H  | 2.143608000  | -1.098538000 | 0.983429000  |
| H  | 1.431471000  | -1.880626000 | 3.048421000  |
| H  | 0.496918000  | -0.378243000 | 3.300943000  |

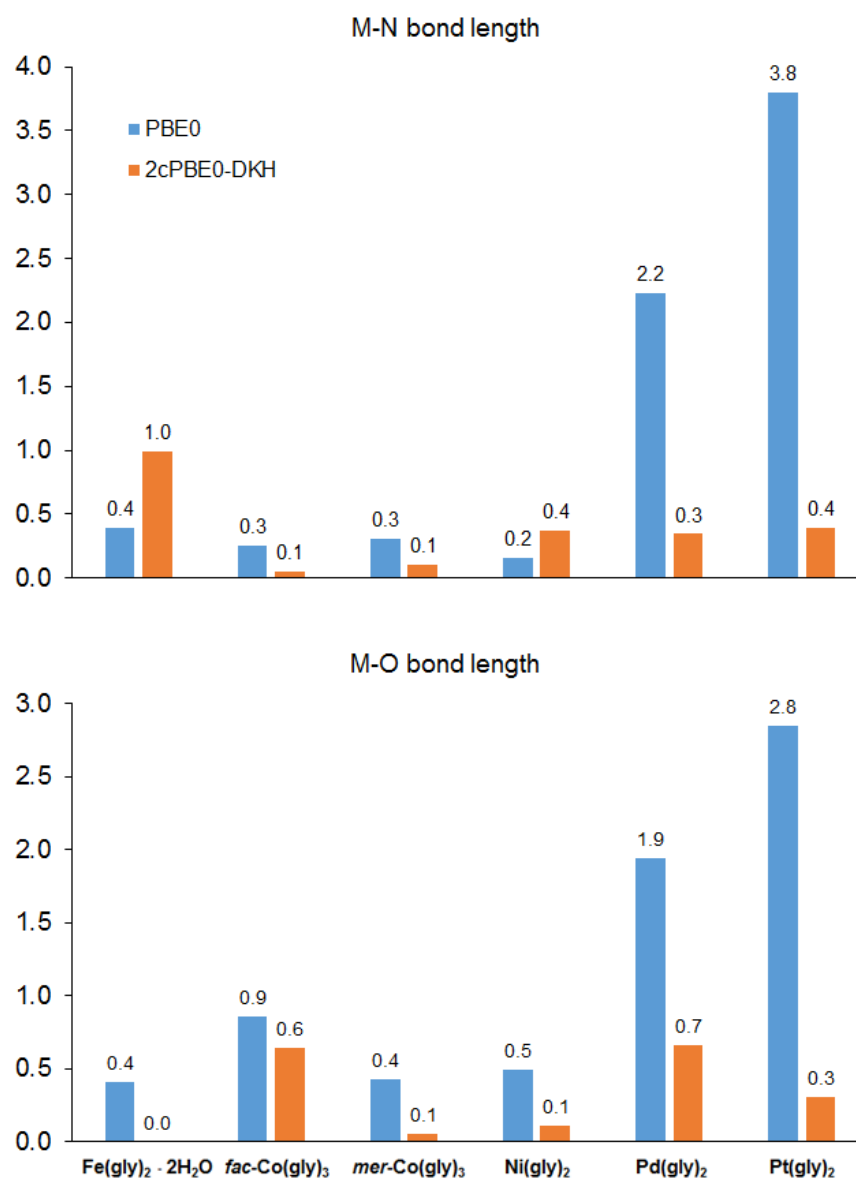

**Figure S1.** Normalized Absolute Deviation (%) of M-N and M-O bond lengths of glycinate **1-6**, evaluated at non-relativistic (PBE0/ATZP) and relativistic (2cPBE0-DKH/ATZP) levels as compared to CCSD geometry.

**Table S1.** Relativistic corrections (ppm) to the  $^1\text{H}$ ,  $^{13}\text{C}$ ,  $^{15}\text{N}$ ,  $^{57}\text{Fe}$ ,  $^{59}\text{Co}$ ,  $^{61}\text{Ni}$ ,  $^{105}\text{Pd}$  and  $^{195}\text{Pt}$  anisotropy tensors of **1–6**, evaluated at the (4c)PBE0/pc-1//aug-pcS-2//dyall.ae3z level.

|                                                                           | <b>Fe(gly)<sub>2</sub> · 2H<sub>2</sub>O</b> |         |       | <i>fac</i> -Co(gly) <sub>3</sub> |       |       | <i>mer</i> -Co(gly) <sub>3</sub> |        |       | <b>Ni(gly)<sub>2</sub></b> |        |       | <b>Pd(gly)<sub>2</sub></b> |        |       | <b>Pt(gly)<sub>2</sub></b> |        |       |
|---------------------------------------------------------------------------|----------------------------------------------|---------|-------|----------------------------------|-------|-------|----------------------------------|--------|-------|----------------------------|--------|-------|----------------------------|--------|-------|----------------------------|--------|-------|
|                                                                           | non-rel                                      | rel     | Δrel  | non-rel                          | rel   | Δrel  | non-rel                          | rel    | Δrel  | non-rel                    | rel    | Δrel  | non-rel                    | rel    | Δrel  | non-rel                    | rel    | Δrel  |
| <b><math>\sigma^{\text{M}}</math></b>                                     | 13758.9                                      | 14405.4 | 646.5 | 917.2                            | 881.6 | −35.6 | 2012.5                           | 2139.3 | 126.8 | 8478.3                     | 8893.7 | 415.4 | 4121.9                     | 4141.0 | 19.1  | 4796.0                     | 5331.6 | 535.6 |
| <b><math>\sigma^{^{15}\text{N}}</math> <i>trans</i> to NH<sub>2</sub></b> | 139.7                                        | 164.5   | 24.8  | 63.6                             | 85.4  | 21.8  | 73.5                             | 86.0   | 12.5  | 54.5                       | 77.1   | 22.6  | 40.2                       | 57.8   | 17.6  | 30.4                       | 64.4   | 34.0  |
| <b><math>\sigma^{^{15}\text{N}}</math> <i>trans</i> to O</b>              |                                              |         |       |                                  |       |       | 82.8                             | 93.0   | 10.2  |                            |        |       |                            |        |       |                            |        |       |
| <b><math>\sigma^{^{13}\text{C}}</math> C=O</b>                            | 80.9                                         | 77.2    | −3.7  | 68.9                             | 66.7  | −2.2  | 64.5                             | 62.1   | −2.4  | 64.2                       | 74.1   | 9.9   | 65.2                       | 66.8   | 1.6   | 68.8                       | 75.3   | 6.5   |
| <b><math>\sigma^{^{13}\text{C}}</math> CH<sub>2</sub></b>                 | 69.3                                         | 64.8    | −4.5  | 48.3                             | 48.2  | −0.1  | 50.8                             | 50.6   | −0.2  | 38.4                       | 33.7   | −4.7  | 41.7                       | 40.9   | −0.8  | 40.0                       | 38.0   | −2.0  |
| <b><math>\sigma^{\text{H}}</math> NH<sub>2</sub></b>                      | 46.11                                        | 46.02   | −0.09 | 21.50                            | 22.66 | 1.16  | 23.35                            | 24.35  | 1.00  | 17.33                      | 17.56  | 0.23  | 15.39                      | 15.35  | −0.04 | 16.86                      | 15.81  | −1.05 |
| <b><math>\sigma^{\text{H}}</math> CH<sub>2</sub></b>                      | 14.30                                        | 13.59   | −0.71 | 5.03                             | 5.33  | 0.30  | 4.41                             | 4.67   | 0.26  | 5.40                       | 5.90   | 0.50  | 8.14                       | 8.03   | −0.11 | 9.31                       | 9.04   | −0.27 |
